# Supplementary material for: Extinction risk from climate change
Source: Springer Nature journal article supplement (doi:10.1038/nature02121), 2004-01-01
Supplement: nature02121-s1.doc [file nature02121-s1.doc]

**Supplementary Information**

**A. Modelling techniques and climate models used in each study.** These are listed in Table 3. Detailed methods of the different distribution model/climate envelope methods are given or cited in refs 8-13 of the main text, and from supplementary references 31-35. Although several studies used projections for 2100, we have allocated them to our scenarios for 2050 according to their end temperatures and CO­­2 levels.

Table 3. Distribution modelling techniques and climate models used in each study

| Data set. | | Queensland: Mammals, birds, frogs & reptiles | Australia: butterflies | Mexico: mammals, birds & butterflies | South Africa: mammals, birds, reptiles & butterflies | Europe: birds | Brazil: Cerrado plants | South Africa: Proteaceae | Europe: plants | Amazon: plants |
| --- | --- | --- | --- | --- | --- | --- | --- | --- | --- | --- |
| Range distribution modelling technique | | BIOCLIM (ANUCLIM) | BIOCLIM | GARP | Principal components analysis/ climate matching | Locally-weighted regression | GARP | Generalised additive modelling (GAM) | IMAGE 2 | Similarity model constrained by a rectilinear envelope |
| Climate model used | |  | HadCM2 Median of 10 different models | HadCM2 | HadCM2 | HadCM3 | HadCM2 | HadCM2 | HadCM2 | HadCM2 |
| Minimum expected climate change scenarios | Climate change scenario & end date |  | SRESB1  2050 | HHGSDX  2050 |  |  | HHGSDX  2050 |  | 2050 |  |
| Global mean temp incr. oC |  | 0.9 | 1.35* |  |  | 1.35* |  | 1.7 |  |
| Local mean temp incr. oC | 1 | 0.8 to 1.4 |  |  |  |  |  |  |  |
| End CO2 level p.p.m.v. | No data | 480 | 443* |  |  | 443* |  | 450 |  |
| Mid-range climate change scenarios | Climate change scenario & end date |  | SRES A1  2050 | HHGGAX  2050 | GGa  2050 |  | HHGGAX  2050 | GGa  (IS92a)  2050 | 2050 |  |
| Global mean temp incr. oC |  | 1.8 | 2* | 3 |  | 2* | 2 | 1.9 |  |
| Local mean temp incr. oC |  | 1.4 to 2.6 |  | 2.5 to 3 |  |  |  |  |  |
| End CO2 level p.p.m.v. |  | 555 | 554* | Doubled since pre-industrial levels |  | 554* | 550 | 550 |  |
| Maximum expected climate change scenarios | Climate change scenario & end date |  | SRESA2  2050 |  |  | SRESB2  2070-2099 |  |  | 2100 | GSa1  2095 |
| Global mean temp incr. oC |  | 2.6 |  |  | 3.0* * |  |  | 2.3 | 2.58* |
| Local mean temp incr. oC | 3.5 | 2.1 to 3.9 |  |  | 3.7  (1.5 to 7.4) |  |  |  |  |
| End CO2 level p.p.m.v. | No data | 560 |  |  | 1360***  (780-1157) |  |  | 550 | 679* |

Values gained from:

*<http://www.cru.uea.ac.uk/link/hadcm2/HadCM2_changes.html>

**<http://ddcweb1.cru.uea.ac.uk/asres/b2/b2_globalclimate.html>

***<http://sres.ciesin.org/index.html> (fig SPM-3)

**B. Extinction estimates based on various z values, using the species-area approach.**

Rosenzweig14 provides a discussion of the appropriate values of z for particular circumstances. We adopted z=0.25 (in the species-area equation) in the text of the paper because this value was found to produce a good match between numbers of species projected to become extinct as a result of habitat loss, and numbers of species found empirically to be extinct already plus those threatened with extinction15,16. Table 4 reports model-fitted (see methods of main paper) estimates of overall extinction risk for z=0.15, 0.25. 0.35 and 1.0, a range of values that have been suggested as potentially appropriate in different circumstances14. Further work is required to assess the most appropriate z value(s) to adopt in the context of the methods used in this paper (especially method 3).

Concentrating on endemics produces a slight bias in favour of species with small geographic ranges, but no clear association exists in our data between original distribution area and climate-related extinction risk. This is an issue that needs to be addressed in future studies. Because a high proportion of the world’s terrestrial species have small geographic ranges 36, any bias should be slight. For example, 2,623 species (28%) of land birds have breeding ranges of less than 50,000 km2 (ref 37), an area less than 5% of the geographic area of our smallest study region, which was South Africa (study regions ranged from 1.2 to 10 million km2 with a total coverage of 26.3 million km2, approximately 20% of the terrestrial land surface). Many species are globally concentrated into regional hotspots and centres of endemism, most of which are smaller than our study regions. For example, (a) 20% of the world’s plants are thought to be concentrated into 0.5% of the world’s land surface, (b) 25 biodiversity hotspots contain 44% of all plant species and 35% of all terrestrial vertebrate species in only 1.4% of the Earth's land area, and (c) 91% of IUCN-assessed plant species are limited to a single country 37 (<http://www.biodiversityhotspots.org/xp/Hotspots/hotspotsScience/>). Given the high projected extinction risk for the hotspots/centres of endemism that we included (South Africa, Queensland & cerrado; also Amazonia), it is possible that global risk to species from climate change is higher than the averages of the regions included in our study.

Table 4. Projected percentage extinctions for different climate change scenarios using species-area approaches

| Method | *z* | With dispersal | | | No dispersal | | |
| --- | --- | --- | --- | --- | --- | --- | --- |
| Minimum expected climate change  n=604 | Mid-range climate change  n=832 | Maximum expected climate change  n=324 | Minimum expected climate change  n=702 | Mid-range climate change  n=995 | Maximum expected climate change  n=259 |
| 1 | 0.15  0.25  0.35  1.00 | 5.6%  8.5%  11.4%  28.3% | 9.5%  14.5%  19.2%  41.8% | 13.6% 21.3% 28.1% 55.1% | 14.6% 21.6% 27.6% 52.8% | 17.7% 25.9% 32.7% 59.0% | 28.4% 38.9% 46.7% 72.9% |
| 2 | 0.15  0.25  0.35  1.00 | 6.5%  9.9% 13.3% 32.2% | 10.0% 15.4% 20.3% 44.2% | 14.4% 22.5% 29.6% 58.4% | 16.8% 24.8% 31.6% 58.8% | 20.0% 29.1% 36.6% 64.6% | 30.5% 41.9% 50.4% 78.6% |
| 3 | 0.15  0.25  0.35  1.00 | 9.4%  13.2% 16.6% 32.2% | 20.5% 20.2% 24.9% 44.2% | 36.6% 32.4% 38.0% 58.4% | 23.3% 30.6% 36.6% 58.8% | 29.0% 36.7% 42.8% 64.6% | 42.9% 51.5% 57.8% 78.6% |
| RDB | n.a. | 11.0% | 19.0% | 33.1% | 33.6% | 44.6% | 58.4% |

Footnote: Model-fitted projected percentage extinction values are given for all four *z* values for all three species-area methods. Values derived from the Red Data Book (RDB) approach are provided in the bottom row for comparison. Samples sizes are numbers of species considered directly for each scenario.

**C. Dealing with expanding species.** A number of alternative approaches could be used to take account of species that are projected to have increased distribution areas for future climate scenarios. For the zero dispersal scenarios, all species are projected to decline or retain their existing area, so this issue does not arise. Species projected to expand are regarded as not having increased extinction risk due to climate change. The method adopted in the main paper analyses expanding species as if they retain their existing distribution area (and therefore have no climate-related risk of extinction), substituting Aoriginal in place of Anew in the equation for each method. This method analyses expanding and contracting species together. To test the sensitivity of our results to this procedure, we carried out a second analysis in which we first separated-out species with Anew>Aoriginal and assigned each of these species zero extinction risk. We then calculated (using methods 1 and 2) extinction proportions using only species with Anew<Aoriginal. The resulting extinction estimates were then combined, using the weighted average of Anew>Aoriginal and Anew<Aoriginal species. These extinction estimates varied by <1% from those shown in Table 1 for the “universal dispersal” estimates of extinction (estimates are identical for zero dispersal scenarios because all projected future distributions are <Aoriginal), suggesting that the exact procedure for incorporating expanding species into the analysis makes little difference to the overall proportion of species predicted to be committed to extinction.

**D. Red Data Book (RDB) classifications.** IUCNRDB classification4assigns species as Critically Endangered if they have declined by >80% in 10 yr, with Critically Endangered species perceived as having > 50% extinction probability. Endangered species have declined by 50-80% in 10 yr, and are regarded as having 20-50% chance of extinction. Vulnerable species have declined by >50% in 20 yr, and are perceived as having 10-20% chance of extinction. These recognised RDB time scales for assigning species to categories are not suited to evaluate the consequences of slow-acting, but persistent threats. Therefore, we have substituted time scales of 50, 50 & 100 years (instead of 10, 10 & 20) for Critically Endangered, Endangered & Vulnerable respectively, over which to assess declines. We applied the listing criteria for minimum range size to the current distributional data to determine current area-based extinction debts for our species. We then repeated this exercise for each of our climate change and dispersal scenarios and subtracted the results of the current classifications from the future scenarios so that we present only extra extinction attributable to climate change.

**Supplementary references.**

1. Hagemeijer , E.J.M. & Blair, M.J. (eds.) *The EBCC Atlas of European
   Breeding Birds: Their distribution and abundance*. (T. & A.D. Poyser, London , 1997)
2. Ratter, J. A., Bridgewater, S., Ribeiro, J. F., Dias, T. A. B. & Silva, M. R. Estudo da distribuição das espécies lenhosas da fitofisionomia Cerrado sentido restrito nos estados compreendidos pelo bioma Cerrado. *Boletim do Herbário Ezechias Paulo Heringer, Brasilia* **5**, 5-43 (2000).
3. Siqueira, M. F. & Peterson, A. T. Consequences of Global climate change for geographic distributions of cerrado tree species. *Biota Neotropica* **3,** <http://www.biotaneotropica.org.br/v3n2/pt/abstract?article+BN00803022003> (2003)
4. Midgley, G. F., Hannah, L., Millar, D., Thuiller, W. & Booth, A. Developing regional and species-level assessments of climate change impacts on biodiversity in the Cape Floristic Region. *Biol. Conserv.* **112,** 87-97 (2003).
5. Miles,L.J. *The Impact of Global Climate Change on Tropical Forest Biodiversity in Amazonia* (Ph.D. thesis, University of Leeds, pp.328, 2002). Available from: <http://www.geog.leeds.ac.uk/projects/l.miles/>
6. Gaston K. J. Species-range size distributions: products of speciation, extinction and transformation. *Philosophical Transactions of the Royal Society of London, Series B* **353,** 219-230 (1998).
7. Stattersfield, A. J., Crosby, M. J., Long, A. J. & Wege, D. C. *Endemic bird Areas of the World*. (BirdLife Conservation Series No. 7. 1998).
